# Supplementary material for: Study on the stability of CH3NH3PbI3films and the effect of post-modification by aluminum oxide in all-solid-state hybrid solar cells
Source: Royal Society of Chemistry journal article supplement (doi:10.1039/c3ta13606j), 2013-11-05
Supplement: c3ta13606j.pdf [file c3ta13606j.pdf]

## Supporting Information

### Post modification by Aluminum oxide for improved performance in all-solid-state perovskite solar cells

Guangda Niu, Wenzhe Li, Fanqi Meng, Liduo Wang\*, Haopeng Dong, and Yong Qiu

Key Lab of Organic Optoelectronics and Molecular Engineering of Ministry of Education,  
Department of Chemistry, Tsinghua University, Beijing, P.R.China.

\*To whom correspondence should be addressed: chldwang@mail.tsinghua.edu.cn

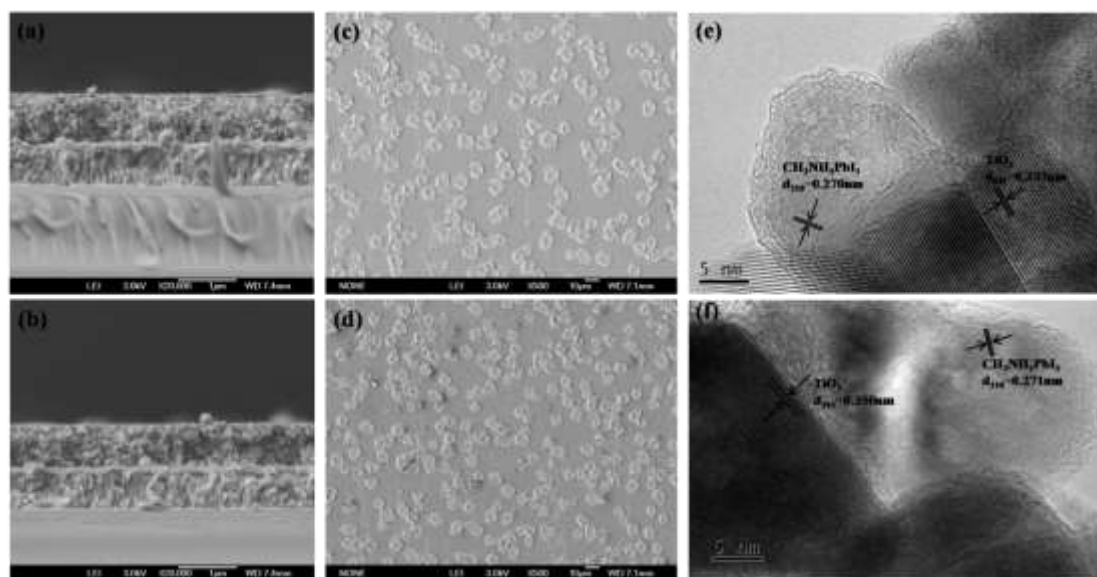

**Fig. S1** SEM and TEM images: (a) cross sectional SEM image of  $\text{TiO}_2/\text{CH}_3\text{NH}_3\text{PbI}_3$ , (b) cross sectional SEM image of  $\text{TiO}_2/\text{CH}_3\text{NH}_3\text{PbI}_3/\text{Al}_2\text{O}_3$ , (c) SEM image of  $\text{TiO}_2/\text{CH}_3\text{NH}_3\text{PbI}_3$ , (d) SEM image of  $\text{TiO}_2/\text{CH}_3\text{NH}_3\text{PbI}_3/\text{Al}_2\text{O}_3$ , (e) HRTEM of  $\text{TiO}_2/\text{CH}_3\text{NH}_3\text{PbI}_3$ , (f) HRTEM of  $\text{TiO}_2/\text{CH}_3\text{NH}_3\text{PbI}_3/\text{Al}_2\text{O}_3$ .

(Figure S1 (c)(d)) shows that square or circular pillars of  $\text{CH}_3\text{NH}_3\text{PbI}_3$  grows on  $\text{TiO}_2$  and high resolution transmission electron microscope (HRTEM) (Figure S1 (e)(f)) reveals  $\text{CH}_3\text{NH}_3\text{PbI}_3$  on  $\text{TiO}_2$  and there are uncovered sites on  $\text{TiO}_2$ , which is consistent with previous reports.

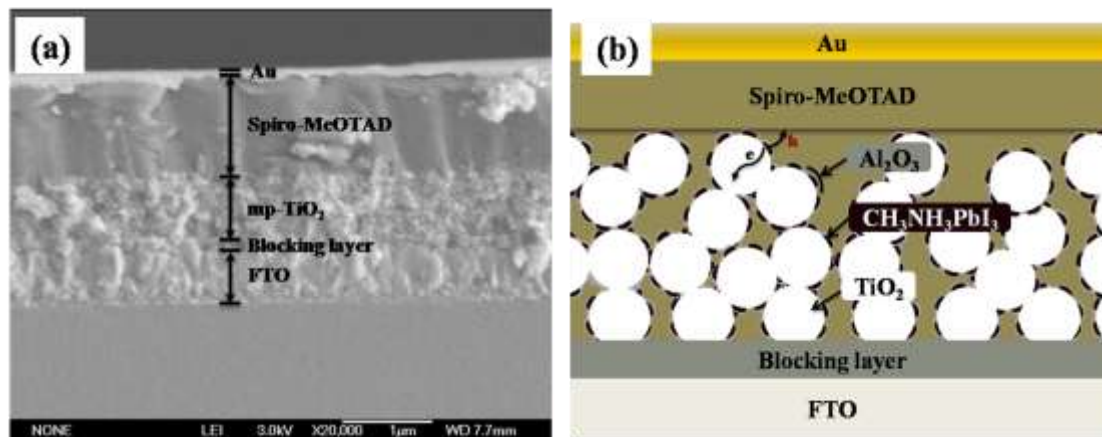

**Fig. S2** Cross-sectional SEM image of the photovoltaic device. Spiro-MeOTAD separates Au

electrode and mesoporous TiO<sub>2</sub>.
